# Supplementary material for: Determination of thallium(iii) ions by oxidative hydrolysis of rhodamine–hydroxamate
Source: Royal Society of Chemistry journal article supplement (doi:10.1039/d0nj05002d), 2020-11-27
Supplement: d0nj05002d1.pdf [file d0nj05002d1.pdf]

## Electronic Supplementary Information

### Determination of thallium(III) ions by oxidative hydrolysis of rhodamine-hydroxamate

Jae Hoon Yoo, Yu Jeong Lee, Kang Min Lee, Myung Gil Choi, Tae Jung Park,\*  
and Suk-Kyu Chang\*

*Department of Chemistry, Chung-Ang University, Seoul 06974, Republic of Korea*

#### Contents

##### Experimental details.

- Table S1.** Summarization of reported  $Tl^{3+}$ -selective determination methods
- Fig. S1.** Time plot of fluorescence  $Tl^{3+}$  signaling by probes (a) **1** and (b) **2** monitored at 551 nm (for probe **1**) and 583 nm (for probe **2**).
- Fig. S2.** *Pseudo*-first-order kinetic plot of the reaction of probes (a) **1** and (b) **2** with  $Tl^{3+}$ .
- Fig. S3.** Fluorescence spectra of (a) **1** and (b) **2** in the presence and absence of  $Tl^{3+}$  ions.
- Fig. S4.** Fluorescence spectra of **1** and **3** in the presence and absence of  $Tl^{3+}$  ions.
- Fig. S5.** Effect of pH on the fluorescence signaling of  $Tl^{3+}$  by compound **3**.
- Fig. S6.** Effect of pH on the fluorescence signaling of  $Tl^{3+}$  by probe **1**.
- Fig. S7.** Changes in fluorescence enhancement ( $I/I_0$ ) of probe **1** at 551 nm in the presence of  $Tl^{3+}$  ions or common anions. Inset: fluorescence spectra of **1** in the presence of anions.
- Fig. S8.** Picture of TLC plate showing the migration of probe **1**, **1** in the presence of  $Tl^{3+}$ , and reference **4**.
- Fig. S9.** Mass spectrum of  $Tl^{3+}$  signaling product of **1**.
- Fig. S10.** Changes in fluorescence enhancement ( $I/I_0$ ) of probe **1** at 551 nm in the presence of  $Tl^{3+}$  or common oxidants. Inset: fluorescence spectra of **1** in the presence of oxidants.

- Fig. S11.** Time plot of the fluorescence intensity change of IBX signaling by probe **1** at 551 nm.
- Fig. S12.** Effect of solvents on the fluorescence signaling of probe **1** in the presence of  $Tl^{3+}$  and HOCl.
- Fig. S13.** Changes in fluorescence intensity ratio ( $I_{Anion+Tl(III)}/I_{Tl(III)}$ ) of  $Tl^{3+}$  signaling by probe **1** at 551 nm under the competitive conditions of the presence of common anions.
- Fig. S14.**  $Tl^{3+}$  signaling behavior of probe **1** as a function of  $Tl(NO_3)_3$  and  $Tl(OAc)_3$  concentration.
- Fig. S15.**  $Tl^{3+}$  concentration-dependent fluorescence changes of probe **1** at 551 nm.
- Fig. S16.** Changes in absorbance enhancement ( $A/A_0$ ) of probe **1** at 527 nm in the presence of common oxidants.
- Fig. S17.** Changes in absorbance enhancement ( $A/A_0$ ) of probe **1** at 527 nm in the presence of common anions.
- Fig. S18.** Changes in absorbance enhancement ( $A/A_0$ ) of  $Tl^{3+}$  signaling by probe **1** at 527 nm under the competitive conditions of the presence of common metal ions.
- Fig. S19.** Changes in absorbance enhancement ( $A/A_0$ ) of  $Tl^{3+}$  signaling by probe **1** at 527 nm under the competitive conditions of the presence of common anions.
- Fig. S20.** Changes in the fluorescence intensity at 551 nm of probe **1** as a function of concentration of thallium ions in a synthetic urine.
- Fig. S21.**  $^1H$  NMR spectrum of **1** in  $CDCl_3$ .
- Fig. S22.**  $^{13}C$  NMR spectrum of **1** in  $CDCl_3$ .
- Fig. S23.** EI (direct insertion probe) mass spectrum of **1**.
- Fig. S24.**  $^1H$  NMR spectrum of **2** in  $CDCl_3$ .
- Fig. S25.**  $^{13}C$  NMR spectrum of **2** in  $CDCl_3$ .
- Fig. S26.** EI (direct insertion probe) mass spectrum of **2**.
- Fig. S27.**  $^1H$  NMR spectrum of **3** in  $CDCl_3$ .
- Fig. S28.**  $^{13}C$  NMR spectrum of **3** in  $CDCl_3$ .
- Fig. S29.** High resolution ESI mass spectrum of **3**.

## Experimental details.

### Preparation of Probes 1 and 2

Distilled water (20 mL) containing a solution of hydroxylamine hydrochloride (1.40 g, 20 mmol) and sodium hydroxide (0.80 g, 20 mmol) was added to an ethanol solution (20 mL) of rhodamine 6G (0.96 g, 2.0 mmol) or rhodamine B base (0.88 g, 2.0 mmol). After 2 hours of stirring at 25 °C, 200 mL of water was added. Dichloromethane was used to extract the product while anhydrous magnesium sulfate was used to dry the organic phase. A column chromatography made up of silica gel was used for the purification of the crude product (eluant: ethyl acetate).

Probe 1.<sup>S1</sup> Light pink solid, 0.66 g, 77%. <sup>1</sup>H NMR (600 MHz, chloroform-*d*) δ 7.85 – 7.81 (m, 1H), 7.46 – 7.39 (m, 2H), 7.26 (s, 1H), 7.06 – 7.01 (m, 1H), 6.40 (s, 2H), 6.36 (s, 2H), 3.22 (q, *J* = 7.2 Hz, 4H), 1.91 (s, 6H), 1.32 (t, *J* = 7.1 Hz, 6H); <sup>13</sup>C NMR (150 MHz, CDCl<sub>3</sub>) δ 163.52, 152.14, 150.82, 147.55, 132.63, 128.49, 128.08, 127.72, 123.60, 122.80, 117.75, 104.69, 96.99, 65.85, 38.36, 16.76, 14.77; MS (EI); *m/z* calculated for C<sub>26</sub>H<sub>27</sub>N<sub>3</sub>O<sub>3</sub> [M]<sup>+</sup>: 429.2, found 429.0.

Probe 2.<sup>S2</sup> Light pink solid, 0.68 g, 75%. <sup>1</sup>H NMR (600 MHz, chloroform-*d*) δ 7.83 (d, *J* = 7.4 Hz, 1H), 7.42 (dt, *J* = 20.0, 7.3 Hz, 2H), 7.08 (d, *J* = 7.4 Hz, 1H), 6.52 (d, *J* = 8.8 Hz, 2H), 6.43 (d, *J* = 2.6 Hz, 2H), 6.29 (dd, *J* = 8.8, 2.6 Hz, 2H), 3.34 (q, *J* = 7.1 Hz, 8H), 1.17 (t, *J* = 7.0 Hz, 12H); <sup>13</sup>C (150 MHz, CDCl<sub>3</sub>) δ 163.56, 153.76, 150.63, 148.94, 132.59, 128.71, 128.12, 128.03, 123.65, 122.86, 107.93, 104.22, 98.11, 65.82, 44.36, 12.62; MS (EI); *m/z* calculated for C<sub>28</sub>H<sub>32</sub>N<sub>3</sub>O<sub>3</sub> [M+H]<sup>+</sup>: 458.2, found 458.2.

**Table S1.** Summarization of reported Tl<sup>3+</sup>-selective determination methods

| Compound                                                                            | Signal                     | Conditions                                        | LOD <sup>[a]</sup>                           | Mechanism                                                                       | Applications                                                               | Ref. |
|-------------------------------------------------------------------------------------|----------------------------|---------------------------------------------------|----------------------------------------------|---------------------------------------------------------------------------------|----------------------------------------------------------------------------|------|
| 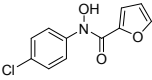   | Colorimetry                | pH 7.0 solution containing 0.1% CHCl <sub>3</sub> | -                                            | Formation of hydroxamic acid-Tl <sup>3+</sup> complex                           | Tl <sup>3+</sup> detection in standard samples                             | [S3] |
|    | Colorimetry                | pH 1.0 Glycine-HCl buffer                         | 1.2 × 10 <sup>-9</sup> M (preconcentration)  | Extraction of Tl <sup>3+</sup> by 2,6-bis( <i>N</i> -phenyl carbamoyl) pyridine | Tl <sup>3+</sup> detection in drinking water, river water, and human serum | [S4] |
|    | Colorimetry                | H <sub>2</sub> PO <sub>4</sub> medium             | 7.2 × 10 <sup>-5</sup> M                     | Oxidative coupling reaction of <b>MBTH</b> with <b>IDH</b>                      | Tl <sup>3+</sup> detection in practical water samples and urine            | [S5] |
|    | Colorimetry                | H <sub>2</sub> PO <sub>4</sub> medium             | 2.6 × 10 <sup>-5</sup> M                     | Oxidation of trifluoperazine-HCl                                                | Tl <sup>3+</sup> detection in alloys, minerals, and urine.                 | [S6] |
|   | Fluorescence               | Acetone containing 10% (v/v) HCl                  | 1.3 × 10 <sup>-12</sup> M (preconcentration) | Oxidation of arsenoxylphenylazo rhodanine                                       | Tl <sup>3+</sup> detection in wine, water and mineral samples              | [S7] |
|  | Colorimetry & Fluorescence | Acetate buffer (pH 4.76) with 20% (v/v) DMSO      | 1.9 × 10 <sup>-7</sup> M                     | Oxidative hydrolysis to rhodamine b base                                        | Scanner-based Tl <sup>3+</sup> determination of commercial reagent         | [S8] |

|                                                                                   |                            |                                                   |                        |                                      |                                                                               |           |
|-----------------------------------------------------------------------------------|----------------------------|---------------------------------------------------|------------------------|--------------------------------------|-------------------------------------------------------------------------------|-----------|
| 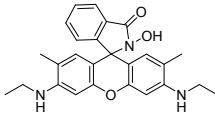 | Colorimetry & Fluorescence | Acetate buffer (pH 4.2) comprising 30% (v/v) DMSO | $2.9 \times 10^{-7}$ M | Oxidative hydrolysis to rhodamine 6G | Determination of urinary Tl <sup>3+</sup> ion using a smartphone-based method | This work |
|-----------------------------------------------------------------------------------|----------------------------|---------------------------------------------------|------------------------|--------------------------------------|-------------------------------------------------------------------------------|-----------|

[a] Limit of detection.

### References.

- [S1] Y. K. Yang, H. J. Cho, J. Lee, I. Shin and J. Tae, *Org. Lett.*, 2009, **11**, 859–861.
- [S2] T. Sun, J. O. Moon, M. G. Choi, Y. Cho, S. W. Ham and S.-K. Chang, *Sens. Actuator B-Chem.*, 2013, **182**, 755–760.
- [S3] Y. K. Agrawal and V. J. Bhatt, *Analyst*, 1986, **111**, 761–765.
- [S4] B. Rezaei, S. Meghdadi and N. Majidi, *Spectrosc. Acta Pt. A-Molec. Biomolec. Spectr.*, 2007, **67**, 92–97.
- [S5] P. Nagaraja, N. G. S. Al-Tayar, A. Shivakumar, A. K. Shresta and A. K. Gowda, *J. Mex. Chem. Soc.*, 2009, **53**, 201–208.
- [S6] H. D. Revanasiddappa and T. N. K. Kumar, *Anal. Sci.*, 2002, **18**, 1131–1135.
- [S7] S. Ge, P. Dai, J. Yu, Y. Zhu, J. Huang, C. Zhang, L. Ge and F. Wan, *Intern. J. Environ. Anal. Chem.*, 2010, **90**, 1139–1147.
- [S8] Y. J. Lee, M. G. Choi, J. H. Yoo, T. J. Park, S. Ahn and S.-K. Chang, *J. Photochem. Photobiol. A-Chem.*, 2020, **394**, 112471.

(a)

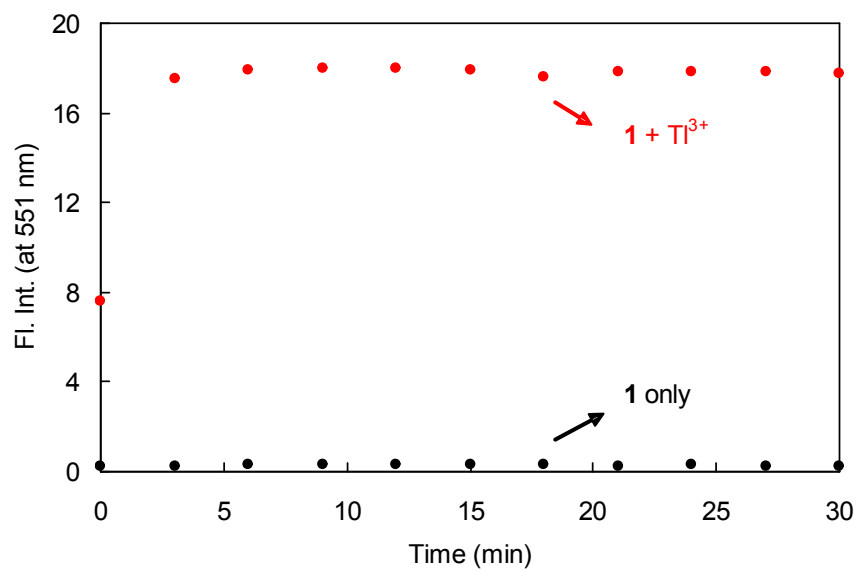

(b)

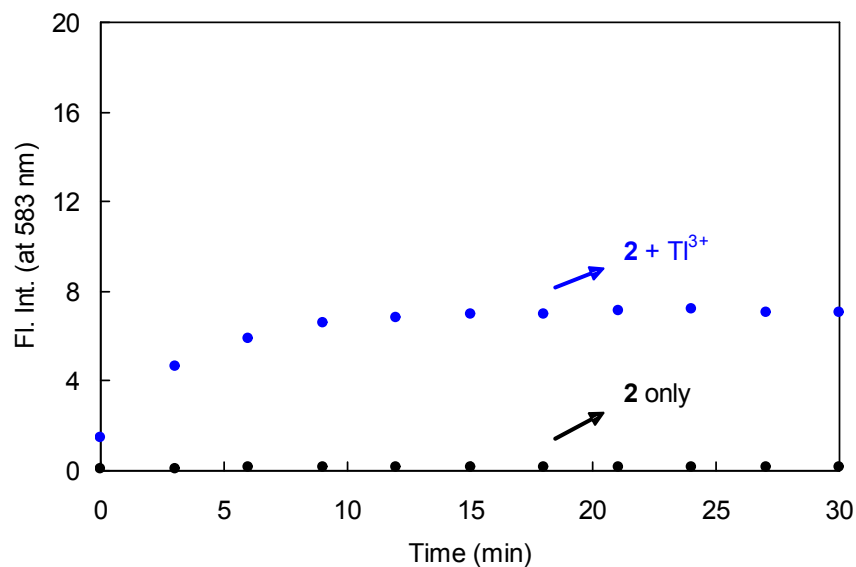

**Fig. S1.** Time plot of fluorescence  $Ti^{3+}$  signaling by probes (a) **1** and (b) **2** monitored at 551 nm (for probe **1**) and 583 nm (for probe **2**).  $[1] = [2] = 5.0 \times 10^{-6}$  M,  $[Ti^{3+}] = 1.5 \times 10^{-3}$  M in acetate buffer solution (pH 4.2, 10 mM) containing 30% (v/v) DMSO.  $\lambda_{ex} = 527$  nm.

(a)

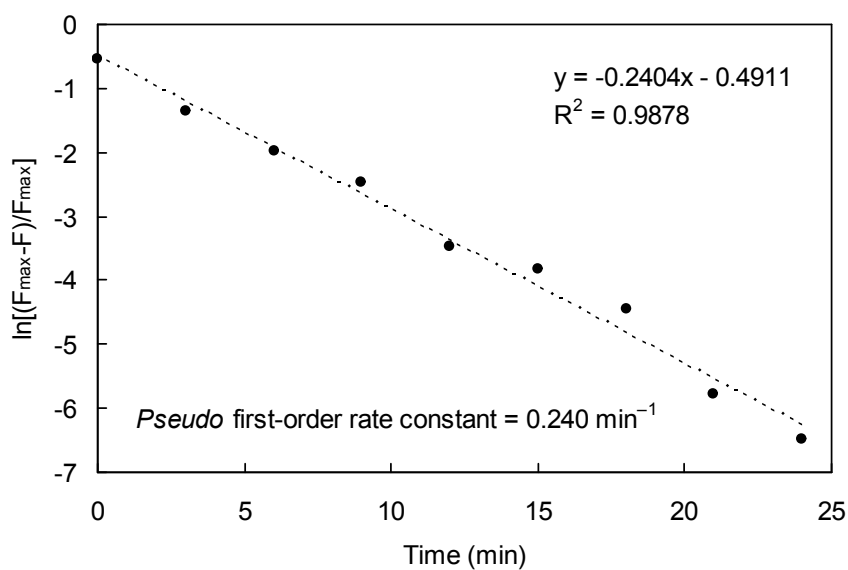

(b)

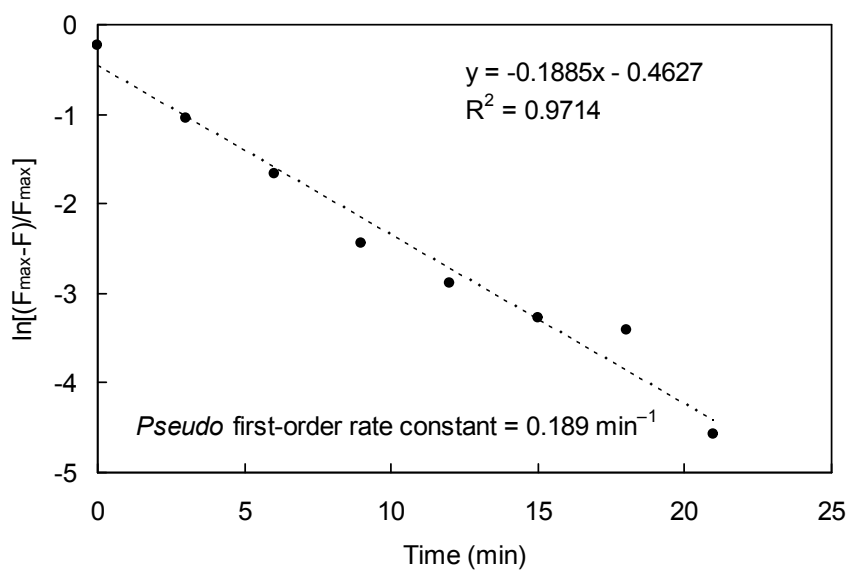

**Fig. S2.** Pseudo-first-order kinetic plot of the reaction of probes (a) **1** and (b) **2** with  $Tl^{3+}$ .  $[1] = [2] = 5.0 \times 10^{-6}$  M,  $[Tl^{3+}] = 1.5 \times 10^{-3}$  M in a solution of acetate buffer (pH 4.2, 10 mM) comprising 30% (v/v) DMSO.  $\lambda_{\text{ex}} = 527$  nm.

(a)

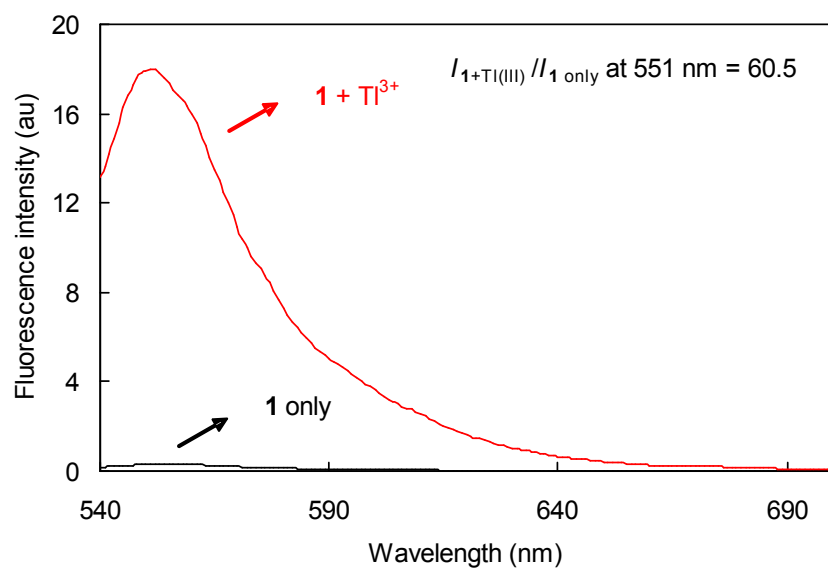

(b)

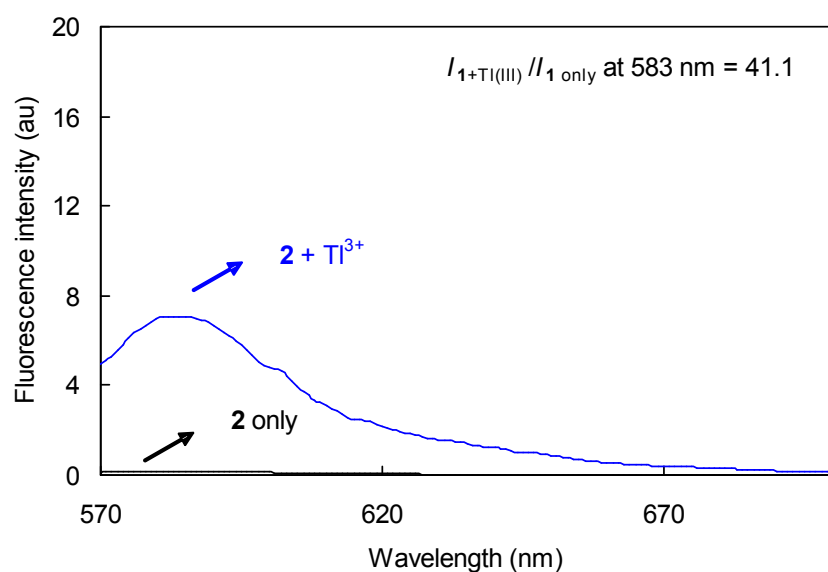

**Fig. S3.** Fluorescence spectra of (a) **1** and (b) **2** in the presence and absence of Ti<sup>3+</sup> ions. [**1**] = [**2**] =  $5.0 \times 10^{-6}$  M, [Ti<sup>3+</sup>] =  $1.5 \times 10^{-3}$  M in acetate buffer solution (pH 4.2, 10 mM) containing 30% (v/v) DMSO.  $\lambda_{\text{ex}}$  = 527 nm for probe **1** and 559 nm for probe **2**.



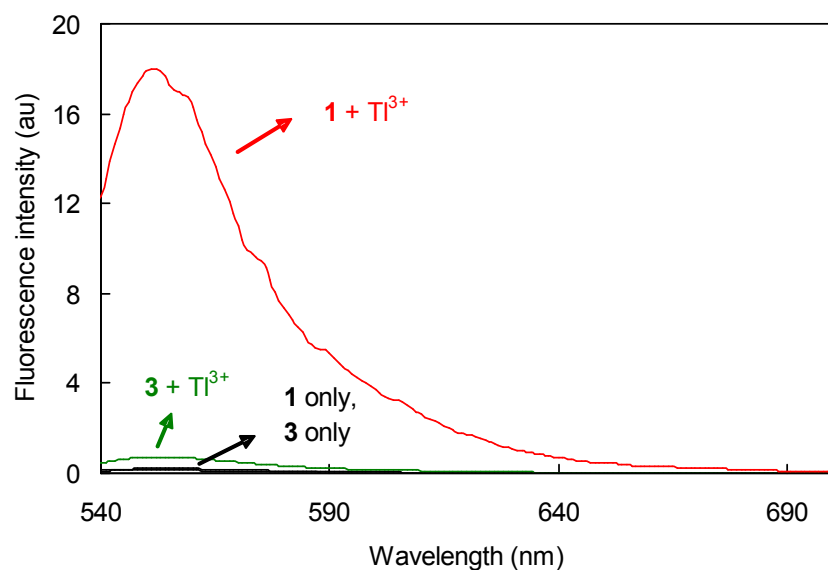

**Fig. S4.** Fluorescence spectra of **1** and **3** in the presence and absence of  $\text{Tl}^{3+}$  ions.  $[\mathbf{1}] = [\mathbf{3}] = 5.0 \times 10^{-6}$  M,  $[\text{Tl}^{3+}] = 1.5 \times 10^{-3}$  M in acetate buffer solution (pH 4.2, 10 mM) containing 30% (v/v) DMSO.  $\lambda_{\text{ex}} = 527$  nm.

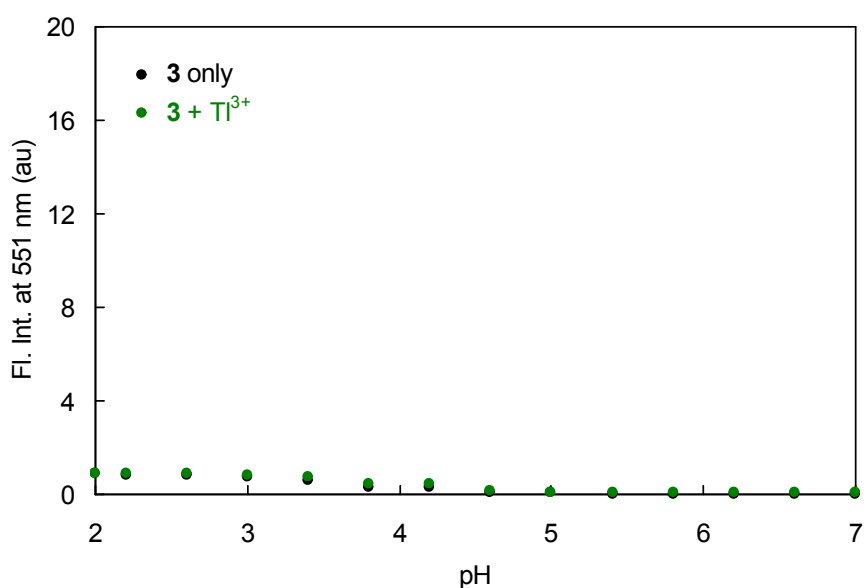

**Fig. S5.** Effect of pH on the fluorescence signaling of  $\text{Tl}^{3+}$  by compound **3**.  $[\mathbf{3}] = 5.0 \times 10^{-6}$  M,  $[\text{Tl}^{3+}] = 1.5 \times 10^{-3}$  M in acetate buffer solution (pH 4.2, 10 mM) containing 30% (v/v) DMSO. pH of measuring solutions was adjusted using 0.1 N HCl and NaOH solutions.  $\lambda_{\text{ex}} = 527$  nm.

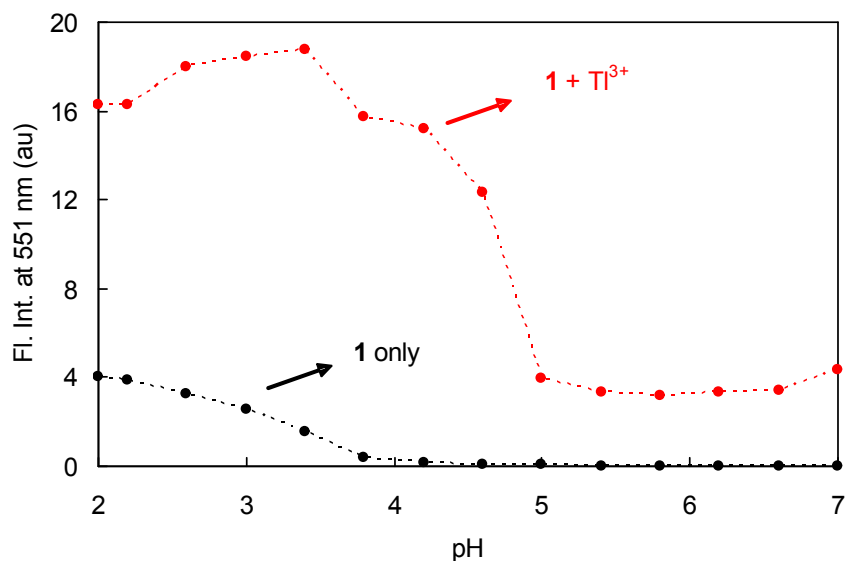

**Fig. S6.** Effect of pH on the fluorescence signaling of  $\text{Ti}^{3+}$  by probe **1**. Data for the alkaline ( $\text{pH} > 7.0$ ) conditions were not obtained as described in the main text.  $[\mathbf{1}] = 5.0 \times 10^{-6} \text{ M}$ ,  $[\text{Ti}^{3+}] = 1.5 \times 10^{-3} \text{ M}$  in acetate buffer solution ( $\text{pH} 4.2$ ,  $10 \text{ mM}$ ) containing 30% ( $v/v$ ) DMSO.  $\text{pH}$  of measuring solutions was adjusted using  $0.1 \text{ N HCl}$  and  $\text{NaOH}$  solutions.  $\lambda_{\text{ex}} = 527 \text{ nm}$ .

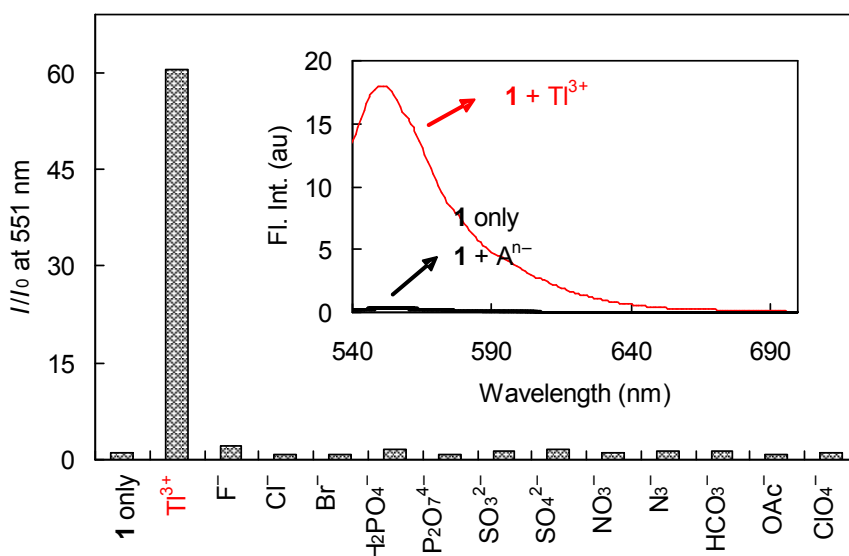

**Fig. S7.** Changes in fluorescence enhancement ( $I/I_0$ ) of probe **1** at 551 nm in the presence of  $\text{Ti}^{3+}$  ions or common anions. Inset: fluorescence spectra of **1** in the presence of anions.  $[\mathbf{1}] = 5.0 \times 10^{-6} \text{ M}$ ,  $[\text{Ti}^{3+}] = [\text{A}^{n-}] = 1.5 \times 10^{-3} \text{ M}$  in acetate buffer solution ( $\text{pH} 4.2$ ,  $10 \text{ mM}$ ) containing 30% ( $v/v$ ) DMSO.  $\lambda_{\text{ex}} = 527 \text{ nm}$ .

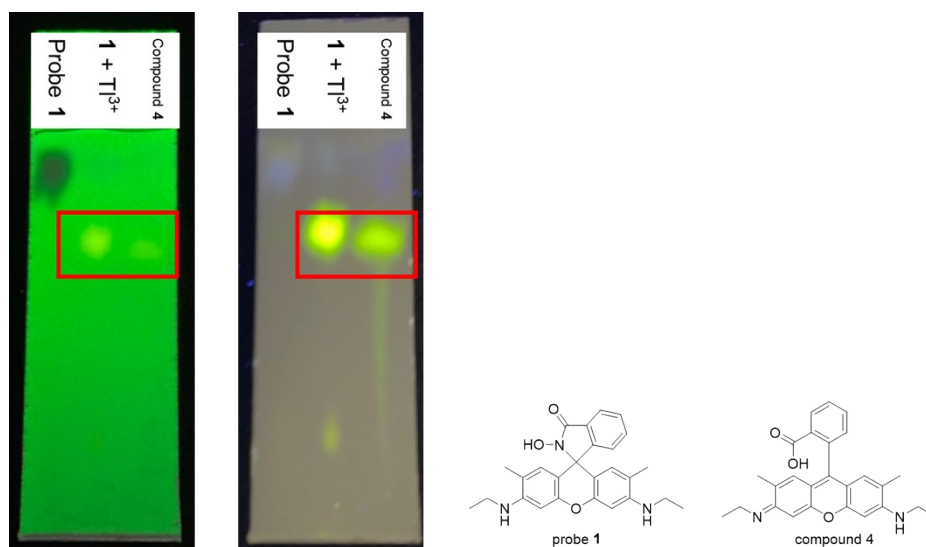

**Fig. S8.** Picture of TLC plate showing the migration of probe **1**, **1** in the presence of  $Tl^{3+}$ , and reference **4**. Silica gel TLC plate under illumination with 254 nm (left) and 365 nm (right) of light, eluent:  $CH_2Cl_2:CH_3OH = 9:1$  (v/v).

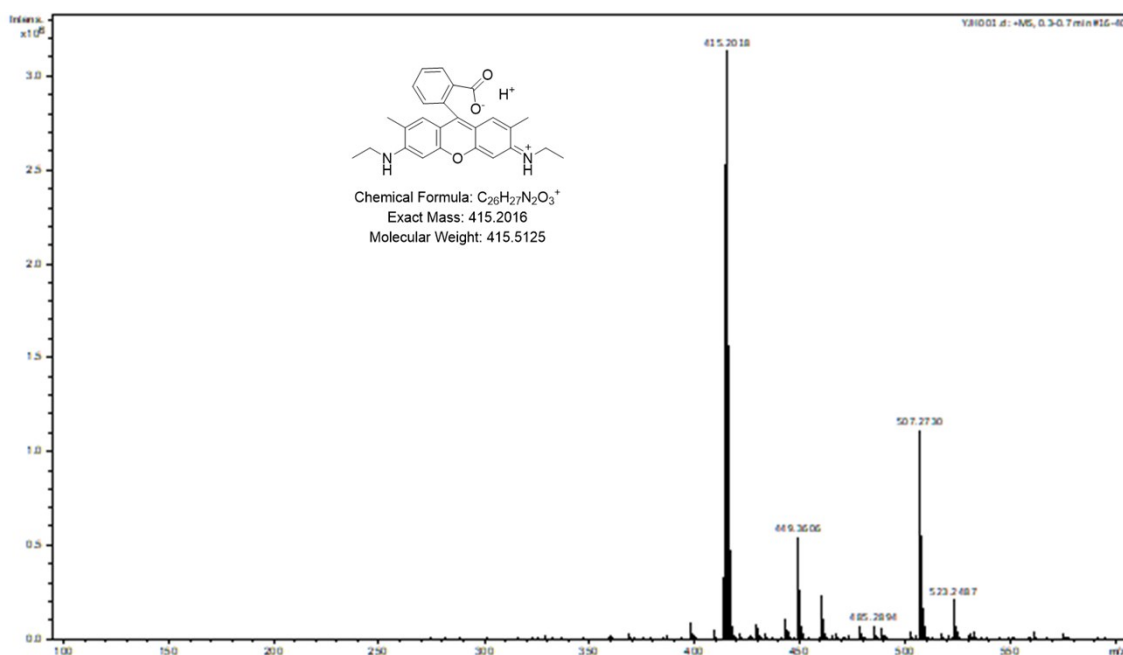

**Fig. S9.** Mass spectrum of  $Tl^{3+}$  signaling product of **1**.

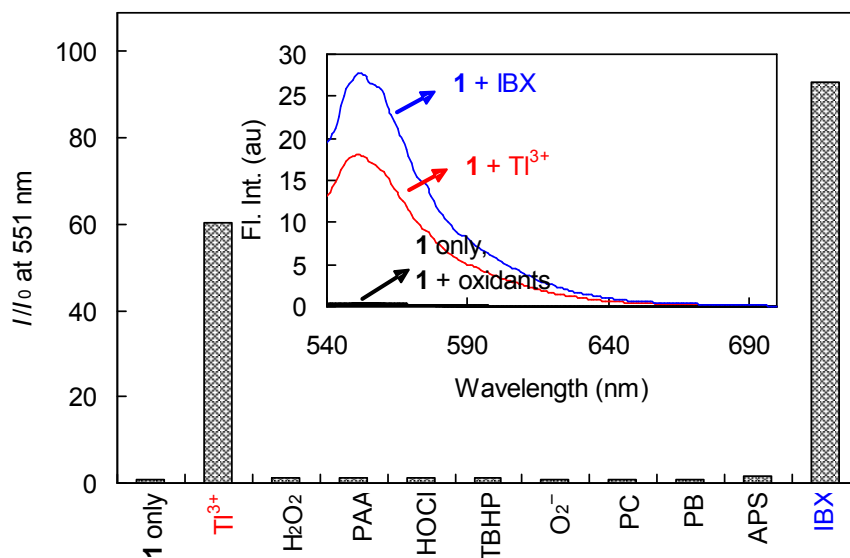

**Fig. S10.** Changes in fluorescence enhancement ( $I/I_0$ ) of probe **1** at 551 nm in the presence of  $Tl^{3+}$  or common oxidants. Inset: fluorescence spectra of **1** in the presence of oxidants. [**1**] =  $5.0 \times 10^{-6}$  M, [ $Tl^{3+}$ ] = [oxidant] =  $1.5 \times 10^{-3}$  M in acetate buffer solution (pH 4.2, 10 mM) containing 30% (v/v) DMSO.  $\lambda_{ex}$  = 527 nm.

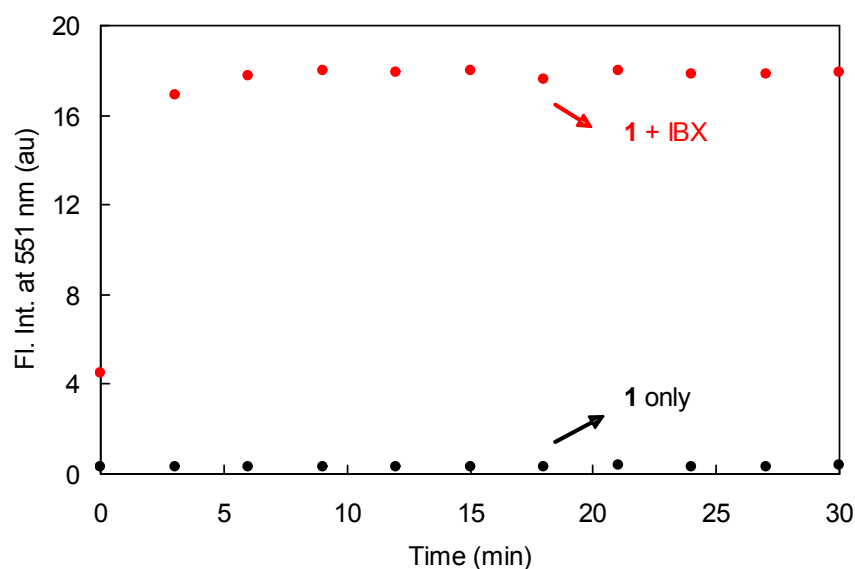

**Fig. S11.** Time plot of the fluorescence intensity change of IBX signaling by probe **1** at 551 nm. [**1**] =  $5.0 \times 10^{-6}$  M, [IBX] =  $1.5 \times 10^{-3}$  M in acetate buffer solution (pH 4.2, 10 mM) containing 30% (v/v) DMSO.  $\lambda_{ex}$  = 527 nm.

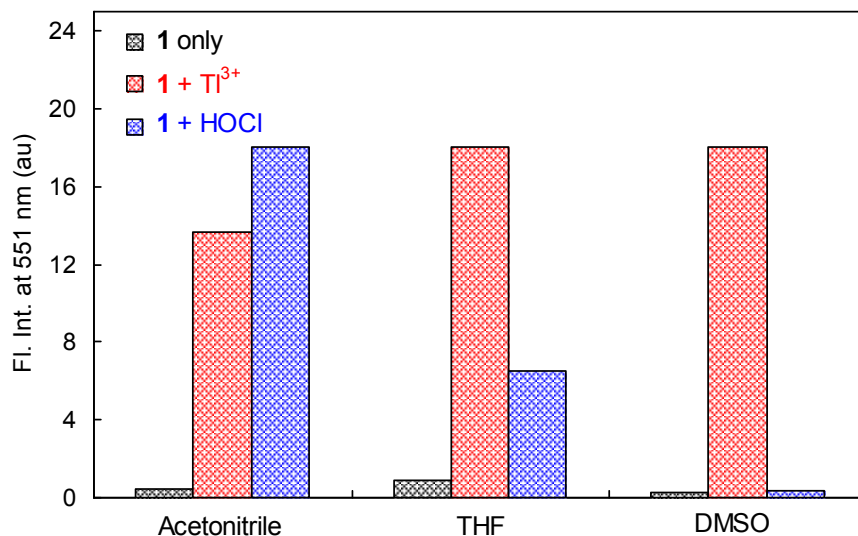

**Fig. S12.** Effect of solvents on the fluorescence signaling of probe **1** in the presence of  $\text{Ti}^{3+}$  and HOCl.  $[\mathbf{1}] = 5.0 \times 10^{-6} \text{ M}$ ,  $[\text{Ti}^{3+}] = 1.5 \times 10^{-3} \text{ M}$ ,  $[\text{HOCl}] = 5.0 \times 10^{-5} \text{ M}$  in a solution of acetate buffer (pH 4.2, 10 mM) comprising 30% (v/v) acetonitrile, THF or DMSO.  $\lambda_{\text{ex}} = 527 \text{ nm}$ .

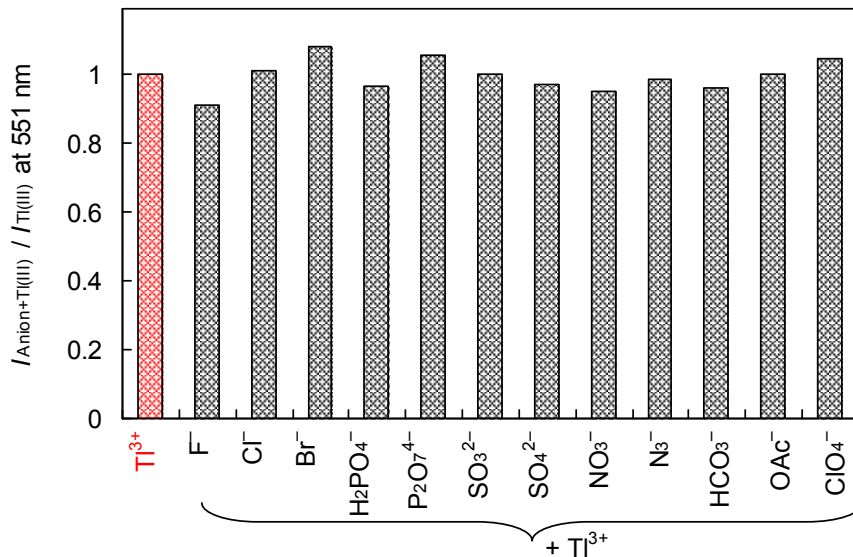

**Fig. S13.** Changes in fluorescence intensity ratio ( $I_{\text{Anion}+\text{Ti(III)}}/I_{\text{Ti(III)}}$ ) of  $\text{Ti}^{3+}$  signaling by probe **1** at 551 nm under the competitive conditions of the presence of common anions.  $[\mathbf{1}] = 5.0 \times 10^{-6} \text{ M}$ ,  $[\text{Ti}^{3+}] = [\text{A}^{n-}] = 1.5 \times 10^{-3} \text{ M}$  in acetate buffer solution (pH 4.2, 10 mM) containing 30% (v/v) DMSO.  $\lambda_{\text{ex}} = 527 \text{ nm}$ .

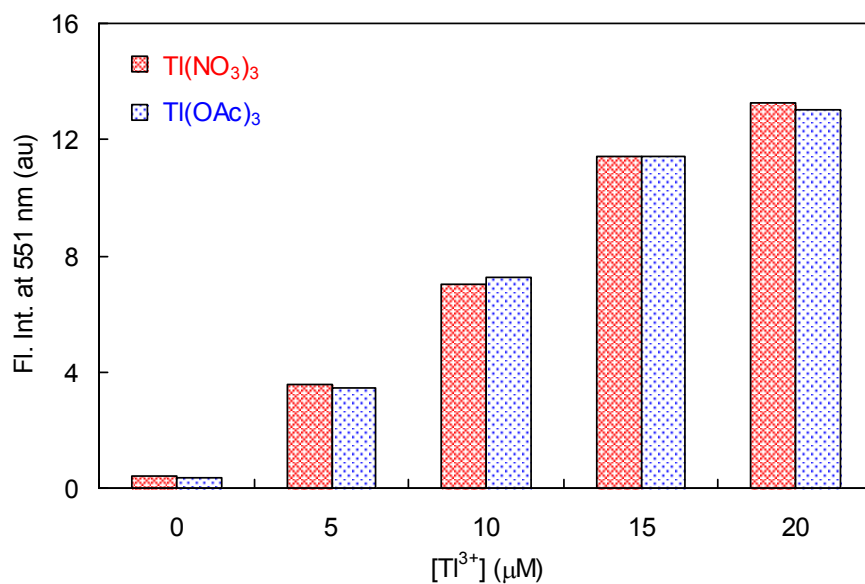

**Fig. S14.** Tl<sup>3+</sup> signaling behavior of probe **1** as a function of Tl(NO<sub>3</sub>)<sub>3</sub> and Tl(OAc)<sub>3</sub> concentration. [1] = 5.0 × 10<sup>-6</sup> M, [Tl(NO<sub>3</sub>)<sub>3</sub>] = [Tl(OAc)<sub>3</sub>] = 0 – 2.0 × 10<sup>-5</sup> M in a solution of acetate buffer (pH 4.2, 10 mM) containing 30% (v/v) DMSO. λ<sub>ex</sub> = 527 nm.

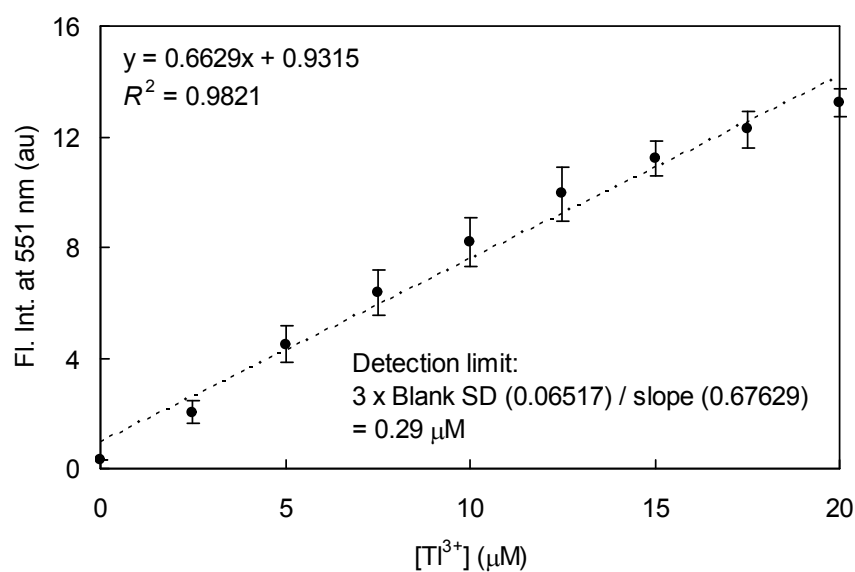

**Fig. S15.** Tl<sup>3+</sup> concentration-dependent fluorescence changes of probe **1** at 551 nm. [1] = 5.0 × 10<sup>-6</sup> M, [Tl<sup>3+</sup>] = 0 – 2.0 × 10<sup>-5</sup> M in acetate buffer solution (pH 4.2, 10 mM) containing 30% (v/v) DMSO. λ<sub>ex</sub> = 527 nm.

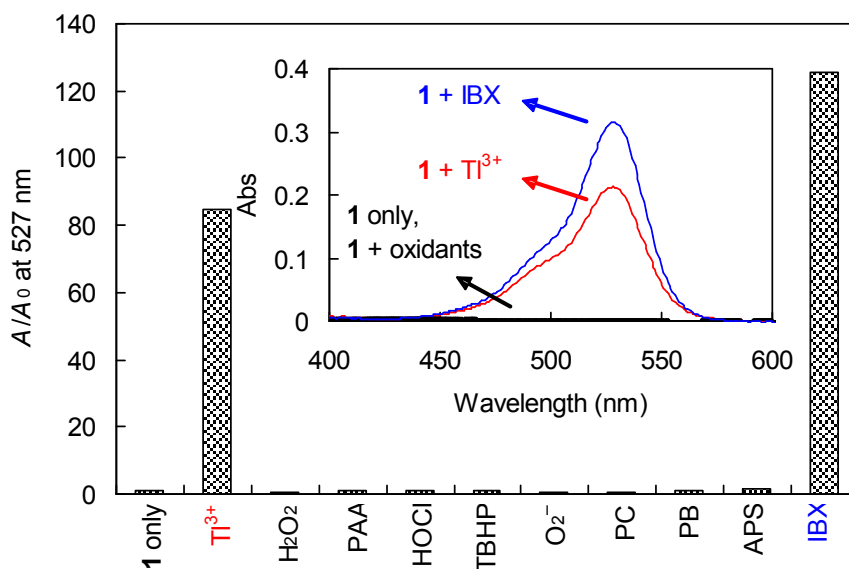

**Fig. S16.** Changes in absorbance enhancement ( $A/A_0$ ) of probe **1** at 527 nm in the presence of common oxidants. Inset: absorption spectra of **1** in the presence of oxidants. [**1**] =  $5.0 \times 10^{-6}$  M, [oxidant] =  $1.5 \times 10^{-3}$  M in acetate buffer solution (pH 4.2, 10 mM) containing 30% (v/v) DMSO.

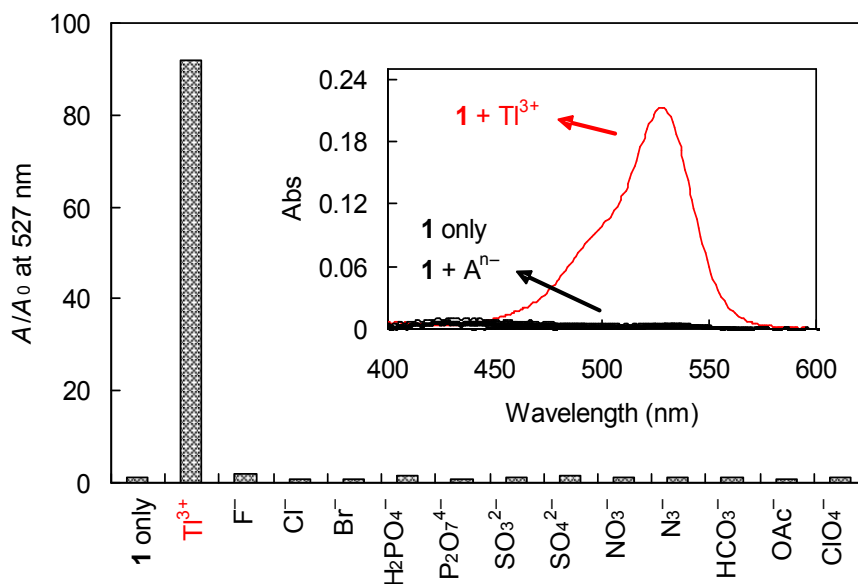

**Fig. S17.** Changes in absorbance enhancement ( $A/A_0$ ) of probe **1** at 527 nm in the presence of common anions. Inset: absorption spectra of **1** in the presence of anions. [**1**] =  $5.0 \times 10^{-6}$  M, [ $A^{n-}$ ] =  $1.5 \times 10^{-3}$  M in acetate buffer solution (pH 4.2, 10 mM) containing 30% (v/v) DMSO.

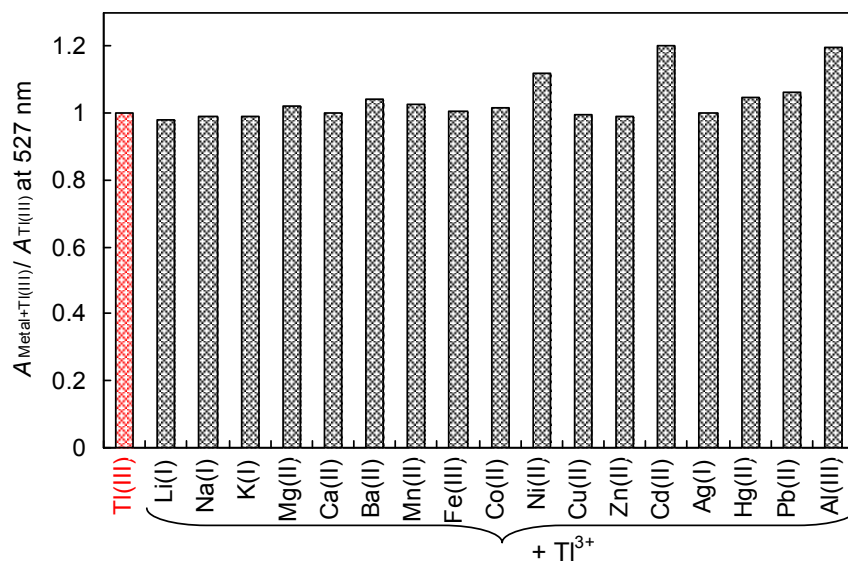

**Fig. S18.** Changes in absorbance enhancement ( $A/A_0$ ) of  $\text{Tl}^{3+}$  signaling by probe **1** at 527 nm under the competitive conditions of the presence of common metal ions.  $[\mathbf{1}] = 5.0 \times 10^{-6}$  M,  $[\text{Tl}^{3+}] = [\text{M}^{n+}] = 1.5 \times 10^{-3}$  M in acetate buffer solution (pH 4.2, 10 mM) containing 30% (v/v) DMSO.

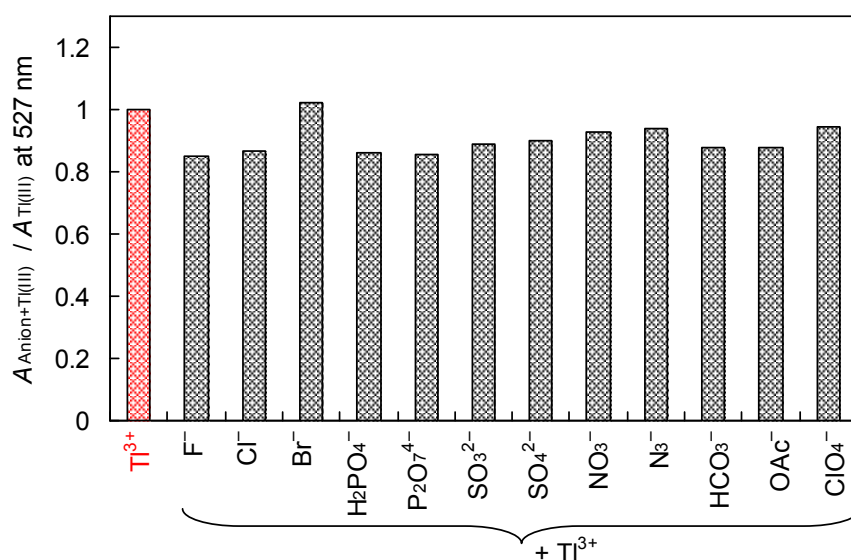

**Fig. S19.** Changes in absorbance enhancement ( $A/A_0$ ) of  $\text{Tl}^{3+}$  signaling by probe **1** at 527 nm under the competitive conditions of the presence of common anions.  $[\mathbf{1}] = 5.0 \times 10^{-6}$  M,  $[\text{Tl}^{3+}] = [\text{A}^{n-}] = 1.5 \times 10^{-3}$  M in acetate buffer solution (pH 4.2, 10 mM) containing 30% (v/v) DMSO.



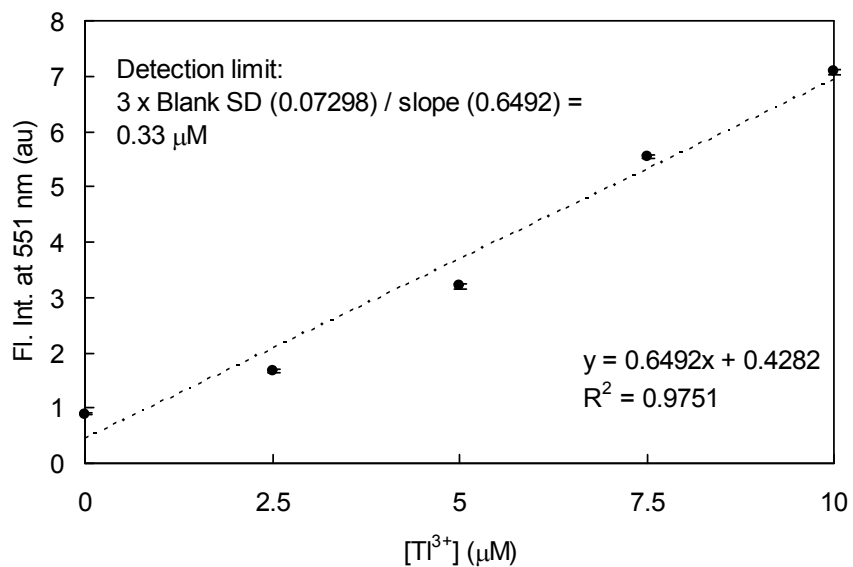

**Fig. S20.** Changes in the fluorescence intensity at 551 nm of probe **1** as a function of concentration of thallium ions in a synthetic urine.  $[\mathbf{1}] = 5.0 \times 10^{-6} \text{ M}$ ,  $[\text{Tl}^{3+}] = 0 - 10 \mu\text{M}$  in acetate buffer solution (pH 4.2, 10 mM) consisting 30% (v/v) DMSO.  $\lambda_{\text{ex}} = 527 \text{ nm}$ .

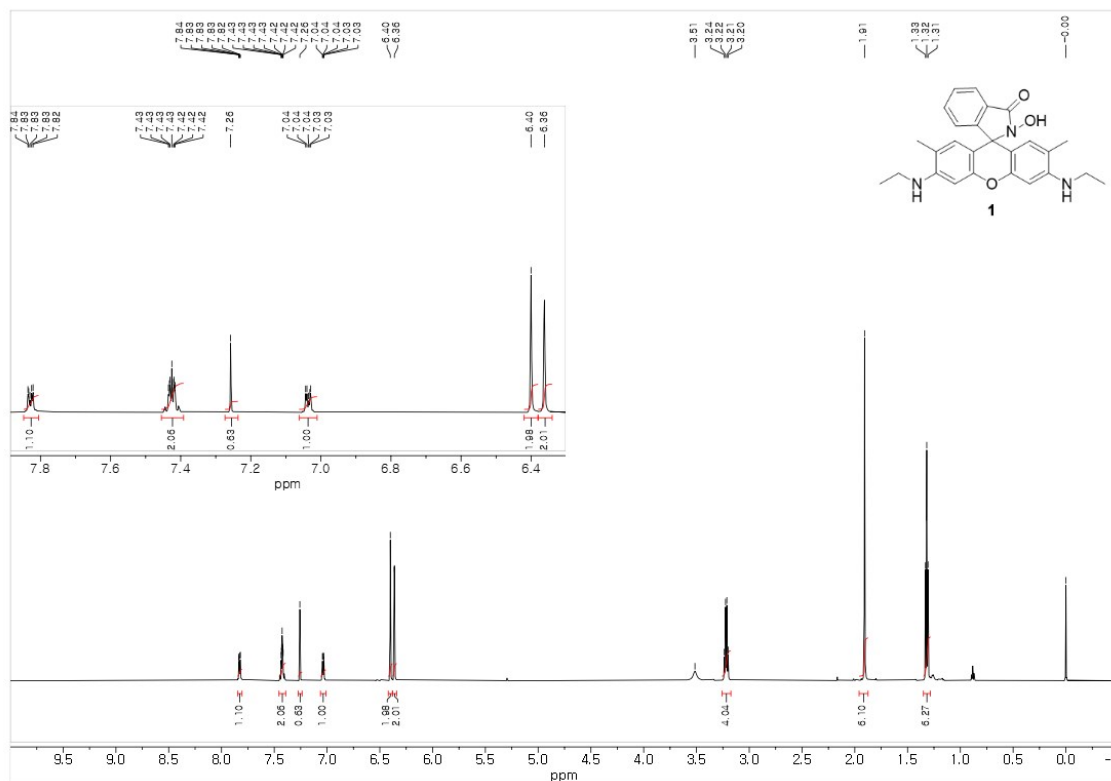

Fig. S21. <sup>1</sup>H NMR spectrum of 1 in CDCl<sub>3</sub>.

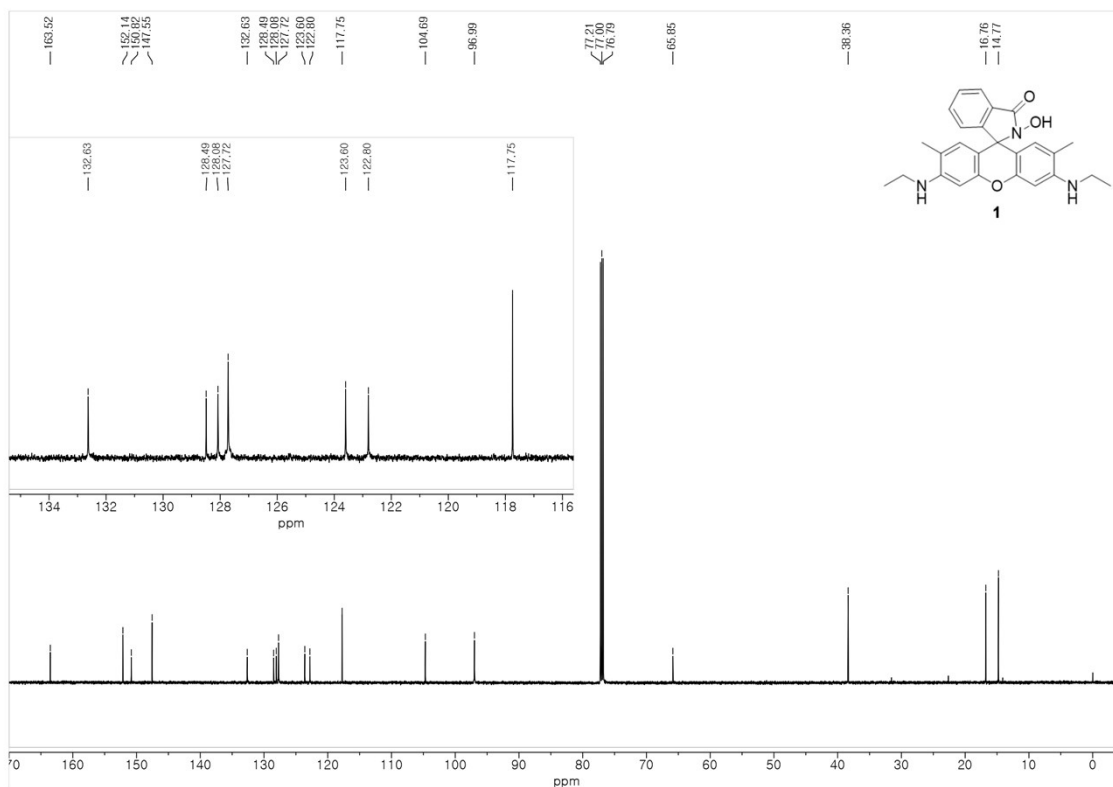

Fig. S22. <sup>13</sup>C NMR spectrum of 1 in CDCl<sub>3</sub>.

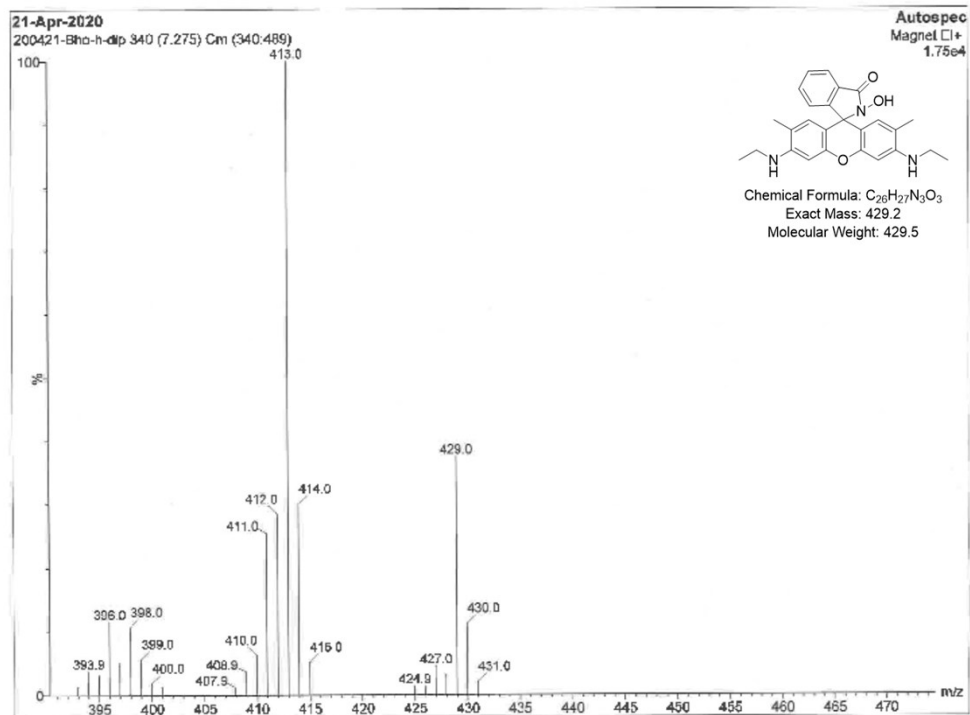

Fig. S23. EI (direct insertion probe) mass spectrum of **1**.

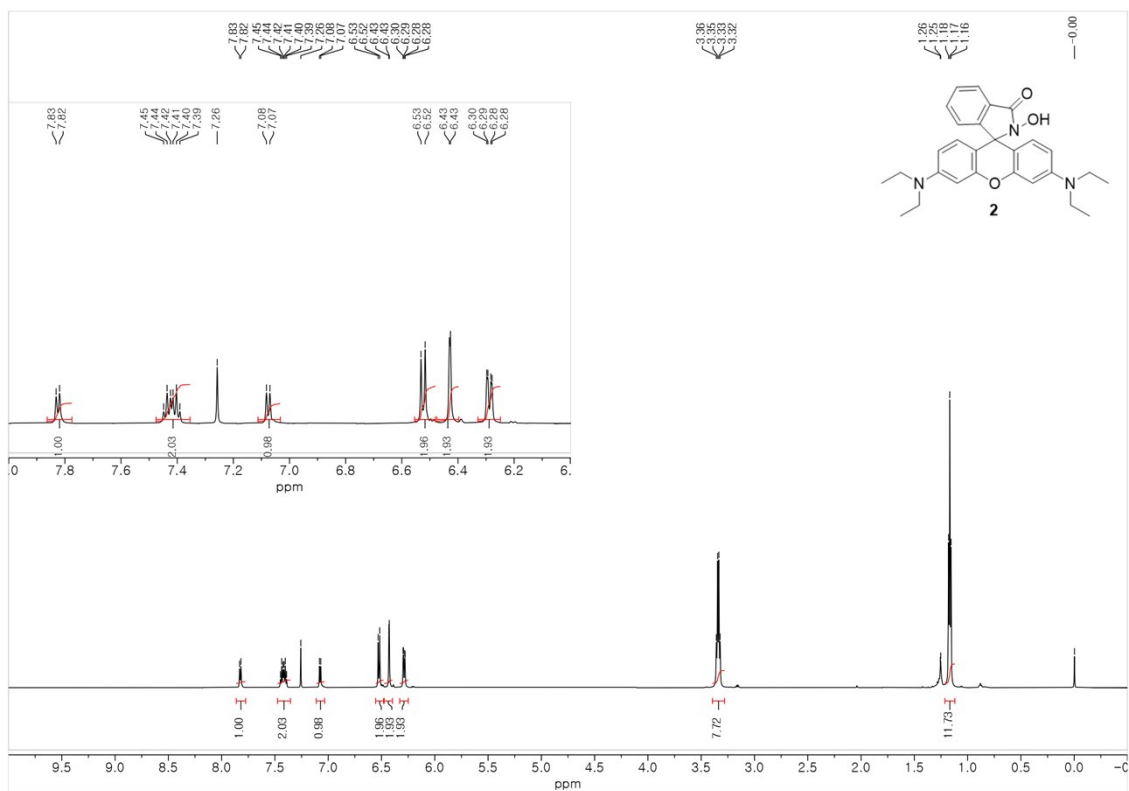

Fig. S24.  $^1H$  NMR spectrum of **2** in  $CDCl_3$ .

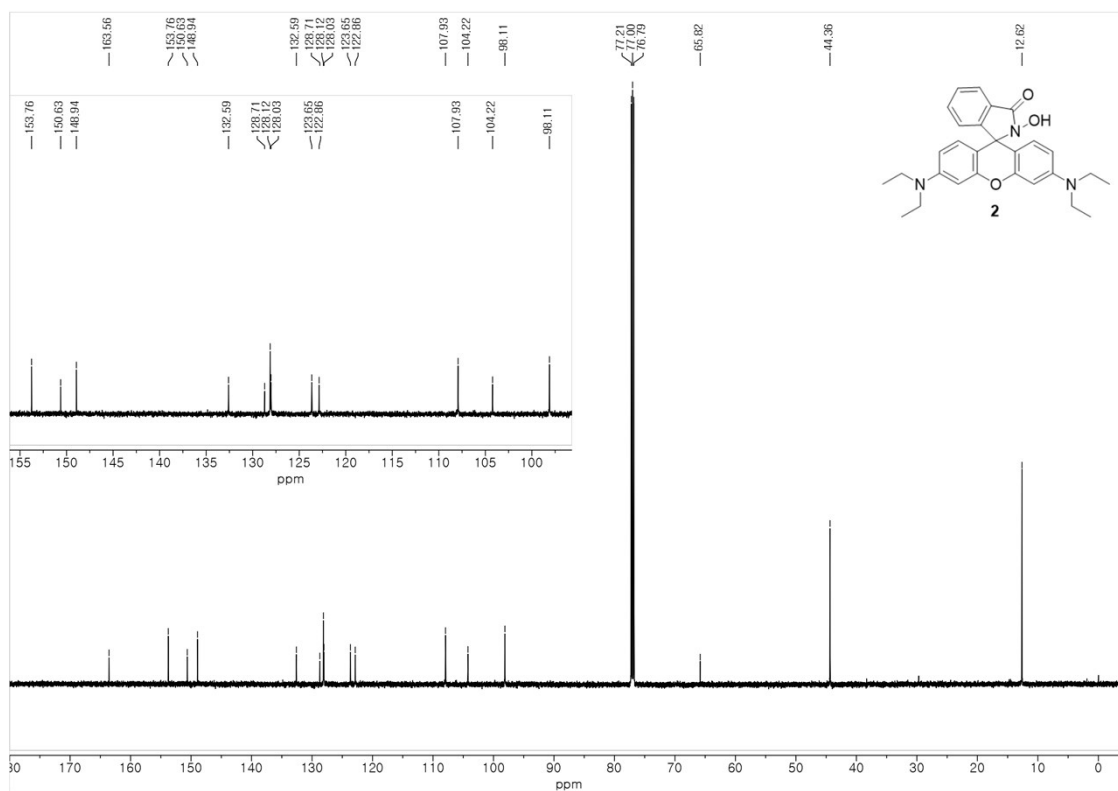

Fig. S25. <sup>13</sup>C NMR spectrum of **2** in CDCl<sub>3</sub>.

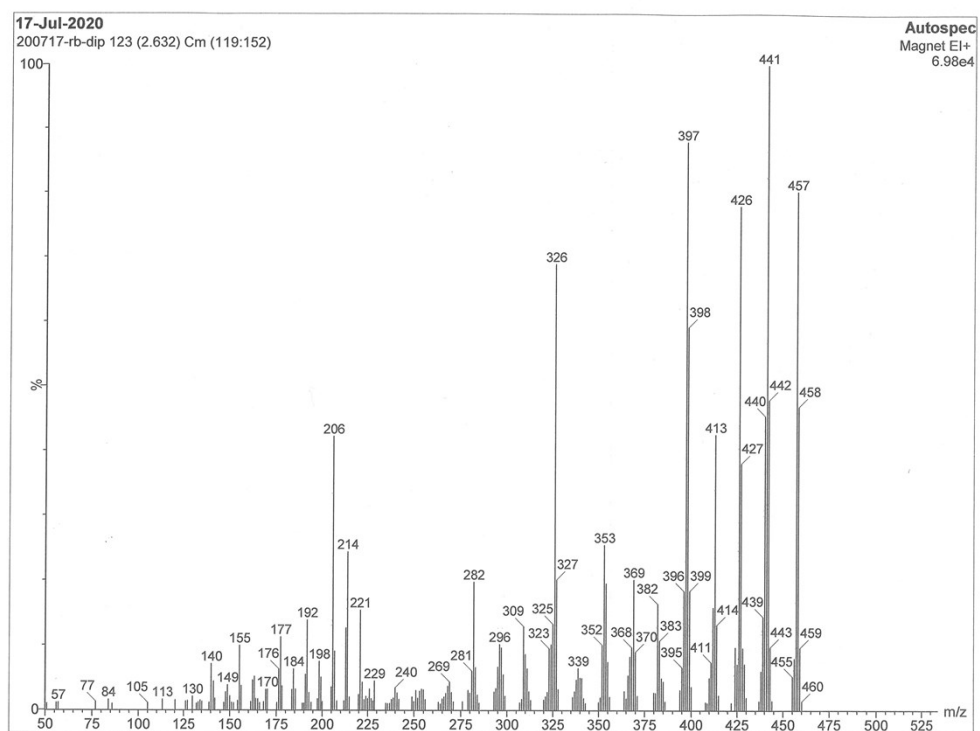

Fig. S26. EI (direct insertion probe) mass spectrum of **2**.

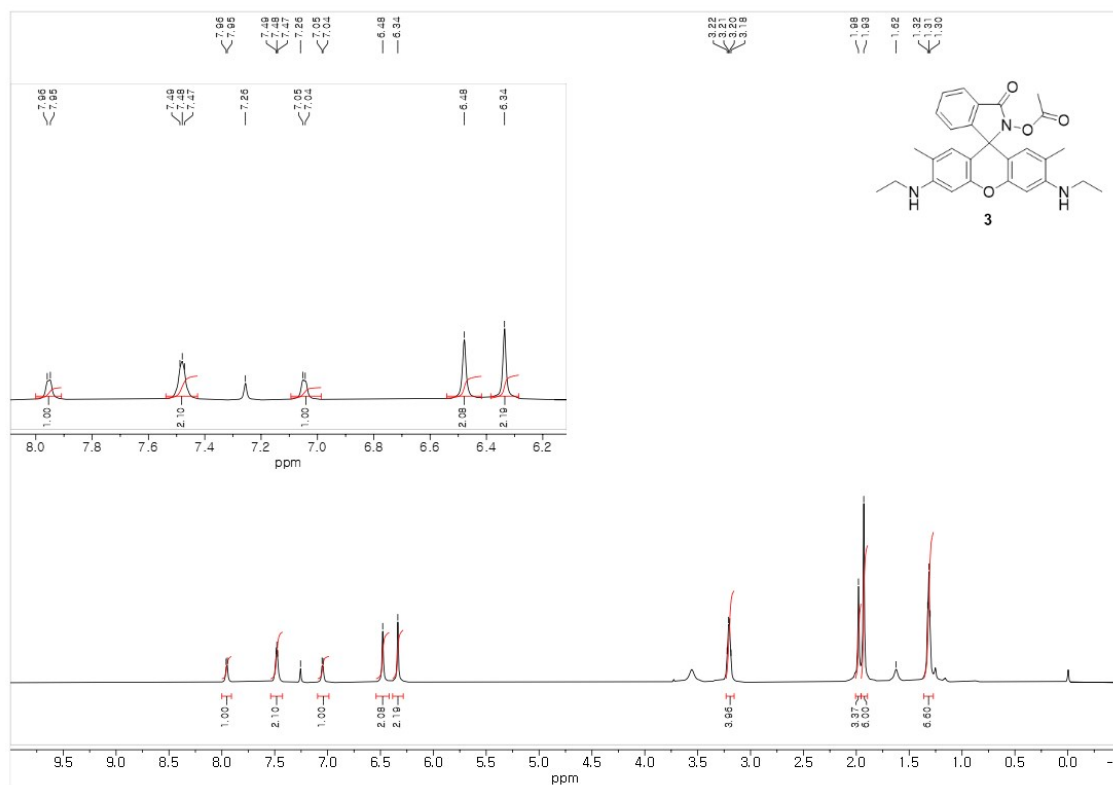

Fig. S27. <sup>1</sup>H NMR spectrum of 3 in CDCl<sub>3</sub>.

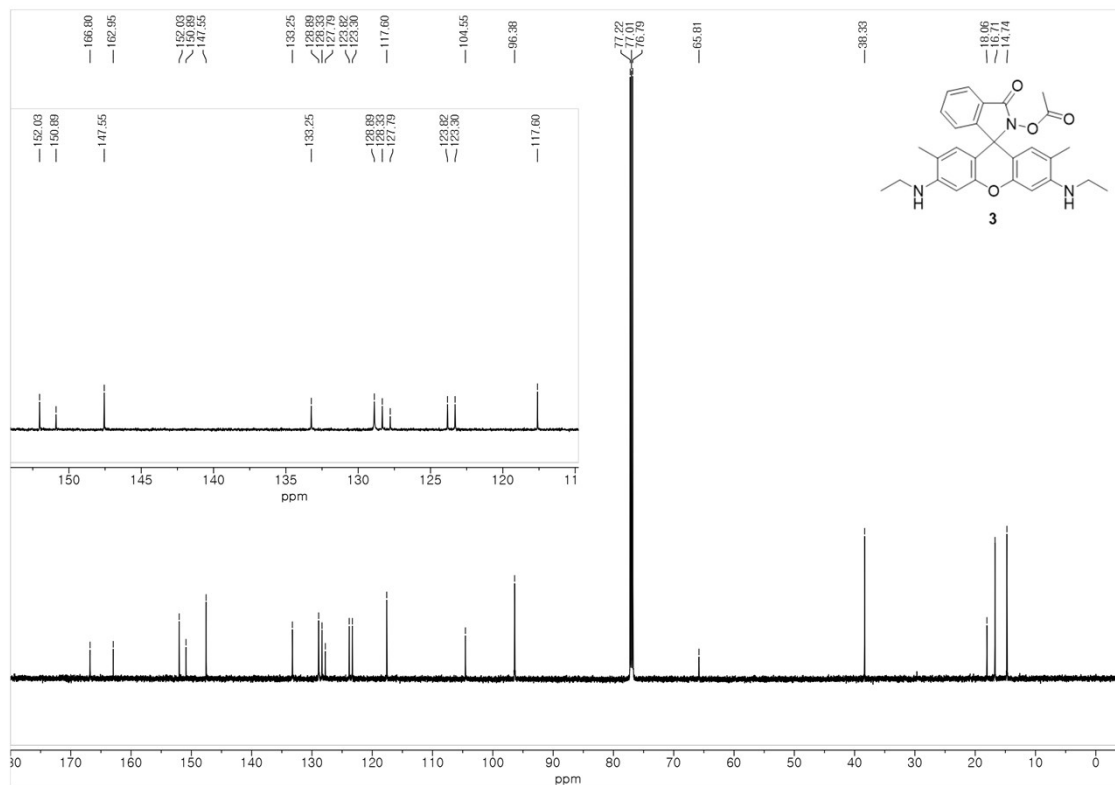

Fig. S28. <sup>13</sup>C NMR spectrum of 3 in CDCl<sub>3</sub>.

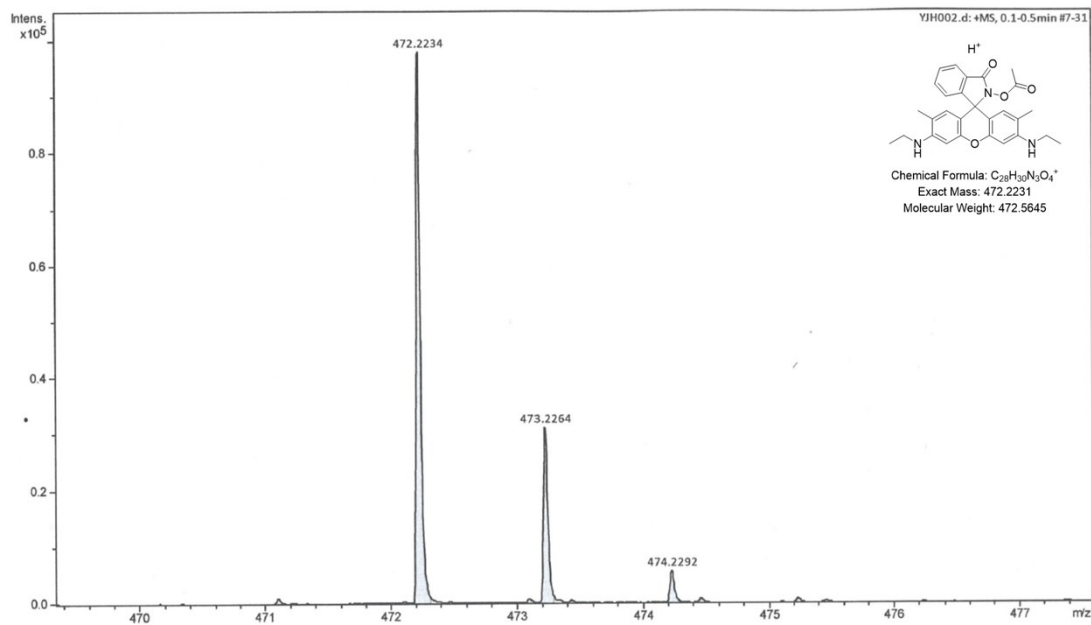

**Fig. S29.** High resolution ESI mass spectrum of **3**.
